# Supplementary material for: A global overview of renal registries: a systematic review
Source: PubMed Central journal article supplement (PMC4377012; doi:10.1186/s12882-015-0028-2), 2015-03-19
Supplement: 12882_2015_28_MOESM1_ESM.pdf [file 12882_2015_28_MOESM1_ESM.pdf]

## Appendix 1. Renal Registries Comprehensive Search Results

### All Databases Combined

| PubMed | EMBASE | Cochrane | CRD | Combined, duplicates removed |
|--------|--------|----------|-----|------------------------------|
| 1206   | 1837   | 20       | 3   | 1980                         |

### Individual Database Searches

#### PubMed

| Search (Note: all searches restricted to 'Humans'; no language restriction)                         | Hits    |
|-----------------------------------------------------------------------------------------------------|---------|
| <b>Renal terms</b>                                                                                  |         |
| #1 hematuria                                                                                        | 16,280  |
| #2 hemoglobinuria                                                                                   | 3412    |
| #3 kidney diseases                                                                                  | 332,022 |
| #4 proteinuria                                                                                      | 32,937  |
| #5 renal[Text Word] OR kidney*[Text Word]                                                           | 517,598 |
| #6 hemodialysis[Text Word]                                                                          | 40,339  |
| #7 hemofiltrat*[Text Word]                                                                          | 4670    |
| #8 CAPD[Text Word] OR CCPD[Text Word] OR APD[Text Word]                                             | 7111    |
| #9 dialysis[Text Word]                                                                              | 101,086 |
| #10 glomeruloscler*[Text Word]                                                                      | 5556    |
| #11 glomeruloneph*[Text Word]                                                                       | 29,362  |
| #12 nephritis[Text Word] OR nephrotic[Text Word] OR nephrosis[Text Word] OR nephropathy*[Text Word] | 55,112  |
| #13 proteinuri*[Text Word]                                                                          | 25,555  |
| #14 #1 OR #2 OR #3 OR #4 OR #5 OR #6 OR #7 OR #8 OR #9 OR #10 OR #11 OR #12 OR #13                  | 607,173 |
|                                                                                                     |         |
| <b>Registry terms</b>                                                                               |         |
| #15 registry[Title] OR registries[Title]                                                            | 9423    |
| #16 database [Title]                                                                                | 6799    |
| #17 #15 OR #16                                                                                      | 16,136  |
|                                                                                                     |         |
| <b>Combination</b>                                                                                  |         |
| #18 #14 AND #17 NOT editorial[Publication Type]                                                     | 1206    |

**EMBASE**

| <b>Search</b> (Note: all searches restricted to 'Humans'; no language restriction) | <b>Hits</b>                                                                       |         |
|------------------------------------------------------------------------------------|-----------------------------------------------------------------------------------|---------|
| <b>Renal terms</b>                                                                 |                                                                                   |         |
| #1                                                                                 | hematuria                                                                         | 24,299  |
| #2                                                                                 | hemoglobinuria                                                                    | 3921    |
| #3                                                                                 | 'kidney disease'/exp                                                              | 443,557 |
| #4                                                                                 | proteinuria                                                                       | 47,129  |
| #5                                                                                 | renal OR kidney*                                                                  | 751,494 |
| #6                                                                                 | hemodialysis OR haemodialysis                                                     | 75,224  |
| #7                                                                                 | hemofiltrat* OR haemofiltrat*                                                     | 6469    |
| #8                                                                                 | CAPD OR CCPD OR APD                                                               | 8488    |
| #9                                                                                 | dialysis                                                                          | 95,683  |
| #10                                                                                | glomeruloscler*                                                                   | 7596    |
| #11                                                                                | glomeruloneph*                                                                    | 31,634  |
| #12                                                                                | nephritis OR nephrotic OR nephrosis OR nephropathy*                               | 115,941 |
| #13                                                                                | proteinuri*                                                                       | 47,451  |
| #14                                                                                | #1 OR #2 OR #3 OR #4 OR #5 OR #6 OR #7 OR #8 OR #9 OR #10<br>OR #11 OR #12 OR #13 | 792,707 |
| <b>Registry terms</b>                                                              |                                                                                   |         |
| #15                                                                                | registry:ti OR register:ti OR registries:ti                                       | 13,813  |
| #16                                                                                | database:ti OR 'data base':ti                                                     | 7711    |
| #17                                                                                | #15 OR #16                                                                        | 21,380  |
| <b>Combination</b>                                                                 |                                                                                   |         |
| #18                                                                                | #14 AND #17 NOT editorial:it                                                      | 1837    |

## Cochrane Library

| <u>Search</u>                                                                         | <u>Hits</u> |
|---------------------------------------------------------------------------------------|-------------|
| <b>Renal terms</b>                                                                    |             |
| #1 hematuria                                                                          | 465         |
| #2 hemoglobinuria                                                                     | 54          |
| #3 MeSH descriptor <b>Kidney Diseases</b> explode all trees                           | 8387        |
| #4 proteinuria                                                                        | 1975        |
| #5 renal OR kidney*                                                                   | 34,428      |
| #6 hemodialysis OR haemodialysis                                                      | 4772        |
| #7 hemofiltrat* OR haemofiltrat*                                                      | 558         |
| #8 CAPD OR CCPD OR APD                                                                | 745         |
| #9 dialysis                                                                           | 8138        |
| #10 glomeruloscler*                                                                   | 158         |
| #11 glomeruloneph*                                                                    | 871         |
| #12 nephritis OR nephrotic OR nephrosis OR nephropathy*                               | 4290        |
| #13 proteinuri*                                                                       | 2040        |
| #14 #1 OR #2 OR #3 OR #4 OR #5 OR #6 OR #7 OR #8 OR #9 OR #10<br>OR #11 OR #12 OR #13 | 37,729      |
|                                                                                       |             |
| <b>Registry terms</b>                                                                 |             |
| #15 (registry OR registries):ti                                                       | 272         |
| #16 (database):ti                                                                     | 344         |
| #17 #15 OR #16                                                                        | 613         |
|                                                                                       |             |
| <b>Combination</b>                                                                    |             |
| #18 #14 AND #17                                                                       | 20          |

## Centre for Reviews and Dissemination

| <u>Search</u>         | <u>Hits</u>                                                                       |      |
|-----------------------|-----------------------------------------------------------------------------------|------|
| <b>Renal terms</b>    |                                                                                   |      |
| #1                    | hematuria                                                                         | 26   |
| #2                    | hemoglobinuria                                                                    | 8    |
| #3                    | Kidney Diseases                                                                   | 278  |
| #4                    | proteinuria                                                                       | 138  |
| #5                    | renal OR kidney*                                                                  | 2275 |
| #6                    | hemodialysis OR haemodialysis                                                     | 321  |
| #7                    | hemofiltrat* OR haemofiltrat*                                                     | 38   |
| #8                    | CAPD OR CCPD OR APD                                                               | 30   |
| #9                    | dialysis                                                                          | 637  |
| #10                   | glomeruloscler*                                                                   | 3    |
| #11                   | glomeruloneph*                                                                    | 56   |
| #12                   | nephritis OR nephrotic OR nephrosis OR nephropathy*                               | 258  |
| #13                   | proteinuri*                                                                       | 142  |
| #14                   | #1 OR #2 OR #3 OR #4 OR #5 OR #6 OR #7 OR #8 OR #9 OR #10<br>OR #11 OR #12 OR #13 | 2542 |
|                       |                                                                                   |      |
| <b>Registry terms</b> |                                                                                   |      |
| #15                   | (registry):TI OR (registries):TI                                                  | 37   |
| #16                   | (database):TI                                                                     | 40   |
| #17                   | #15 OR #16                                                                        | 75   |
|                       |                                                                                   |      |
| <b>Combination</b>    |                                                                                   |      |
| #18                   | #14 AND #17                                                                       | 3    |
